# Supplementary material
Source: PubMed Central journal article supplement (PMC4091565)
Supplement: psb-9-e28671-s01.pdf [file psb-9-e28671-s01.pdf]

## **Supplemental Material to:**

**Cristiano M Gallep, Thiago A Moraes, Kateřina Červinková,  
Michal Cifra, Masakazu Katsumata, and Peter W Barlow**

**Lunisolar tidal synchronism with biophoton emission  
during intercontinental wheat-seedling germination tests**

**Plant Signaling & Behavior 2013; 9(3)**

**<http://dx.doi.org/10.4161/psb.28671>**

**[www.landesbioscience.com/journals/psb/article/28671](http://www.landesbioscience.com/journals/psb/article/28671)**

**In this packet:**

**Supplemental Figures (S1, S2, S3, S4)**

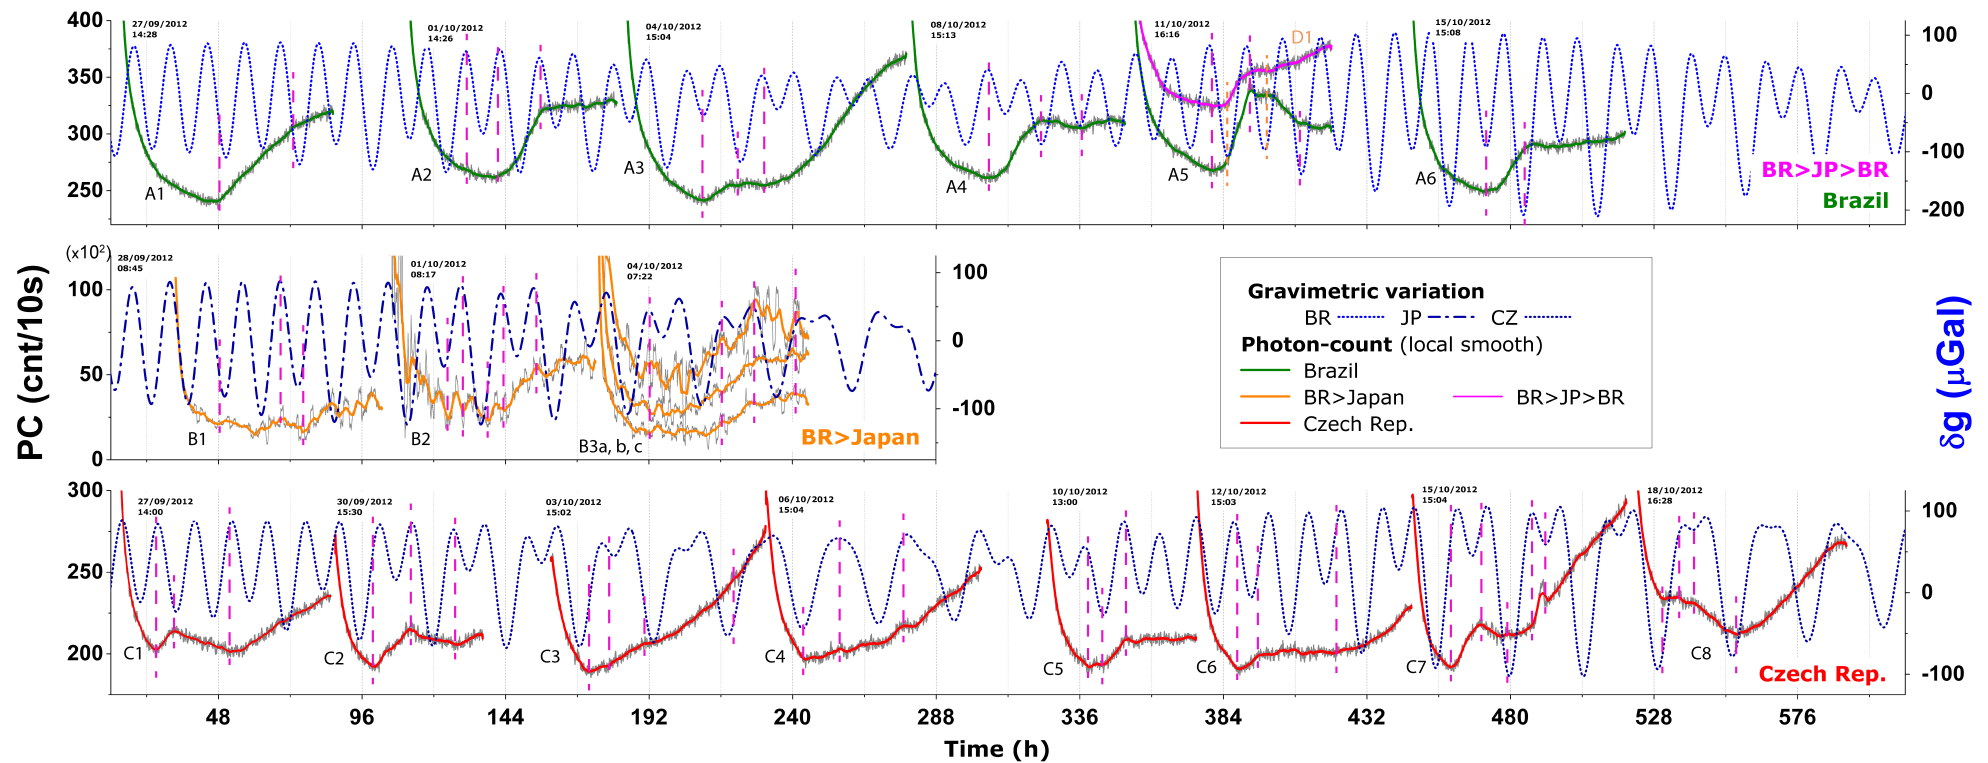

Figure S1. Photon count ( $PC$ , counts/10s) data of spontaneous light emission of wheat seedlings growing in dark: Brazilian samples in Limeira/BR (A series, top), travelled to Hamamatsu/Japan (B, middle) and back to Brazil (D1, top on A5), and Czech samples in Prague (C, bottom), plotted against the contemporaneous local gravimetric acceleration oscillation ( $dg$ ). Vertical marks (dash lines) over singular  $PC$  points.

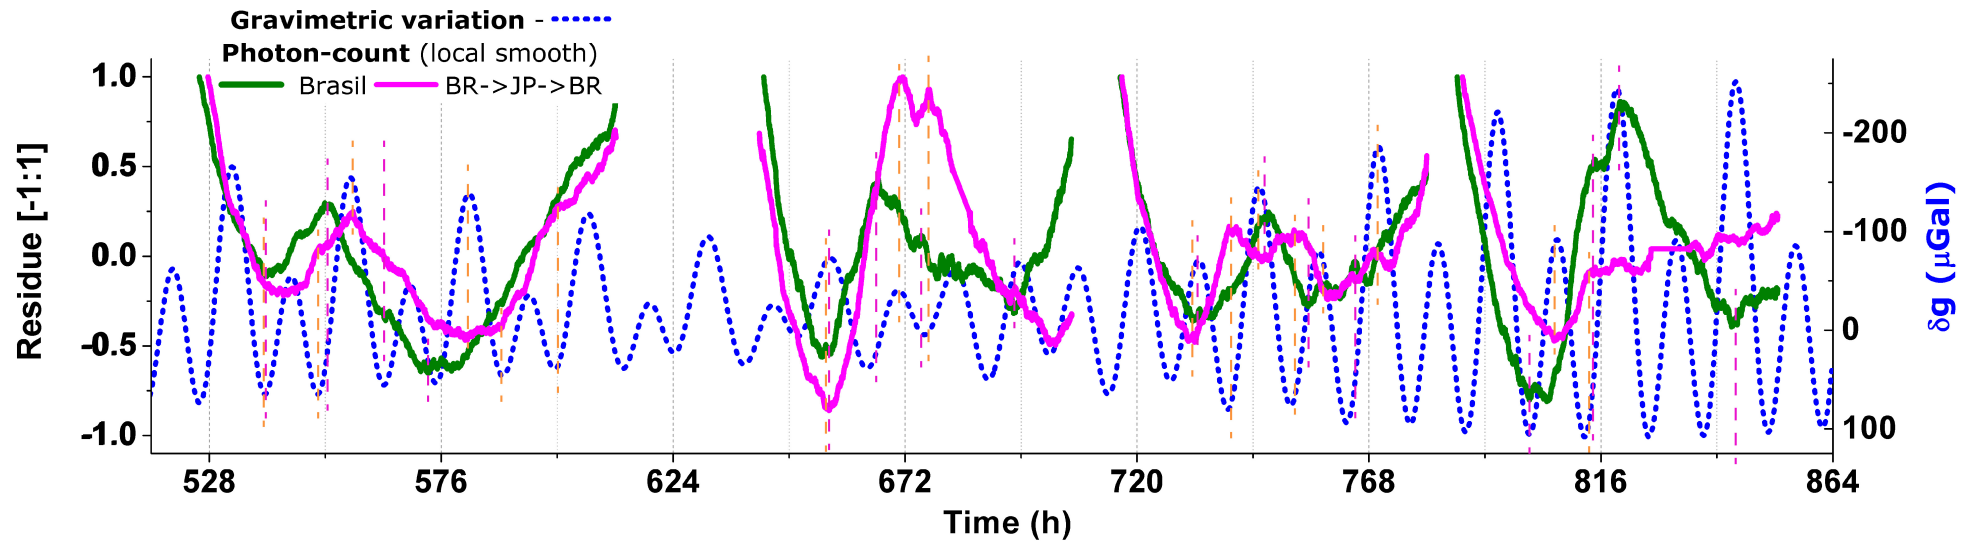

Figure S2. Normalized residue of Photon counts data (Fig.2) to a linear growth fit: Brazilian samples in Limeira/BR and travelled back from Japan to Brazil plotted against the contemporaneous local gravimetric acceleration oscillation ( $\delta g$ ). Vertical marks over singular *PC* points.

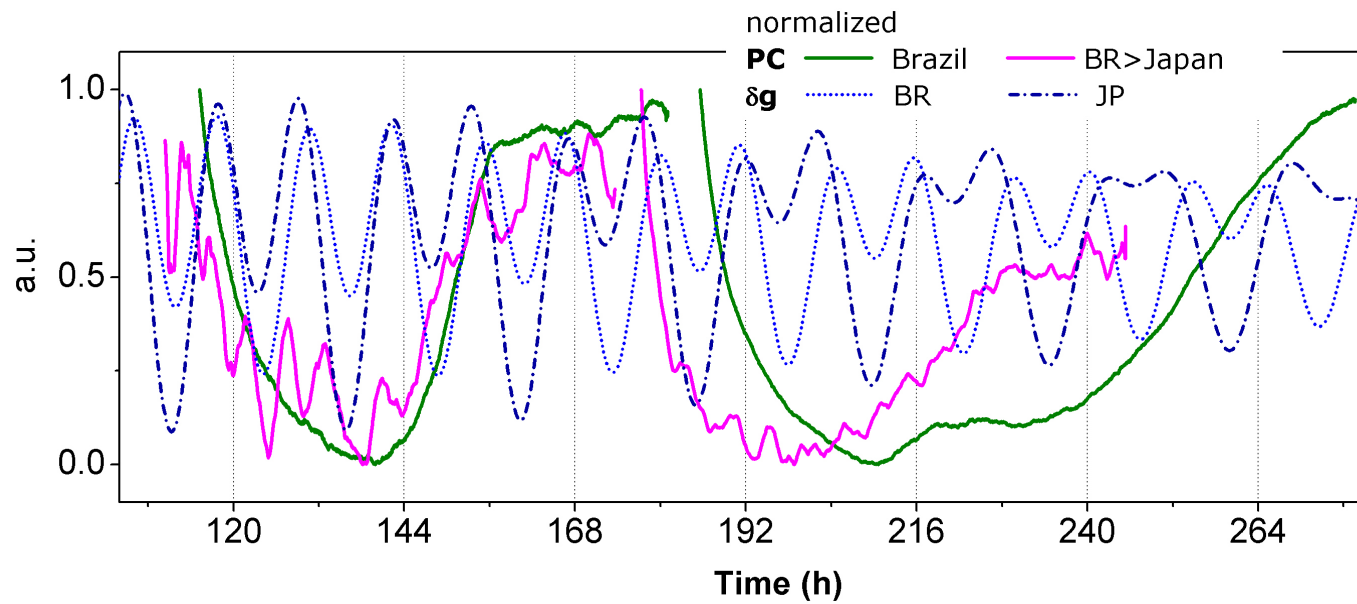

Figure S3. Normalized [0,1] plots for Photon counts data A2, A3, B2 and B3(b), and the Brazilian (BR) and the Japanese (JP) local gravimetric acceleration oscillations.

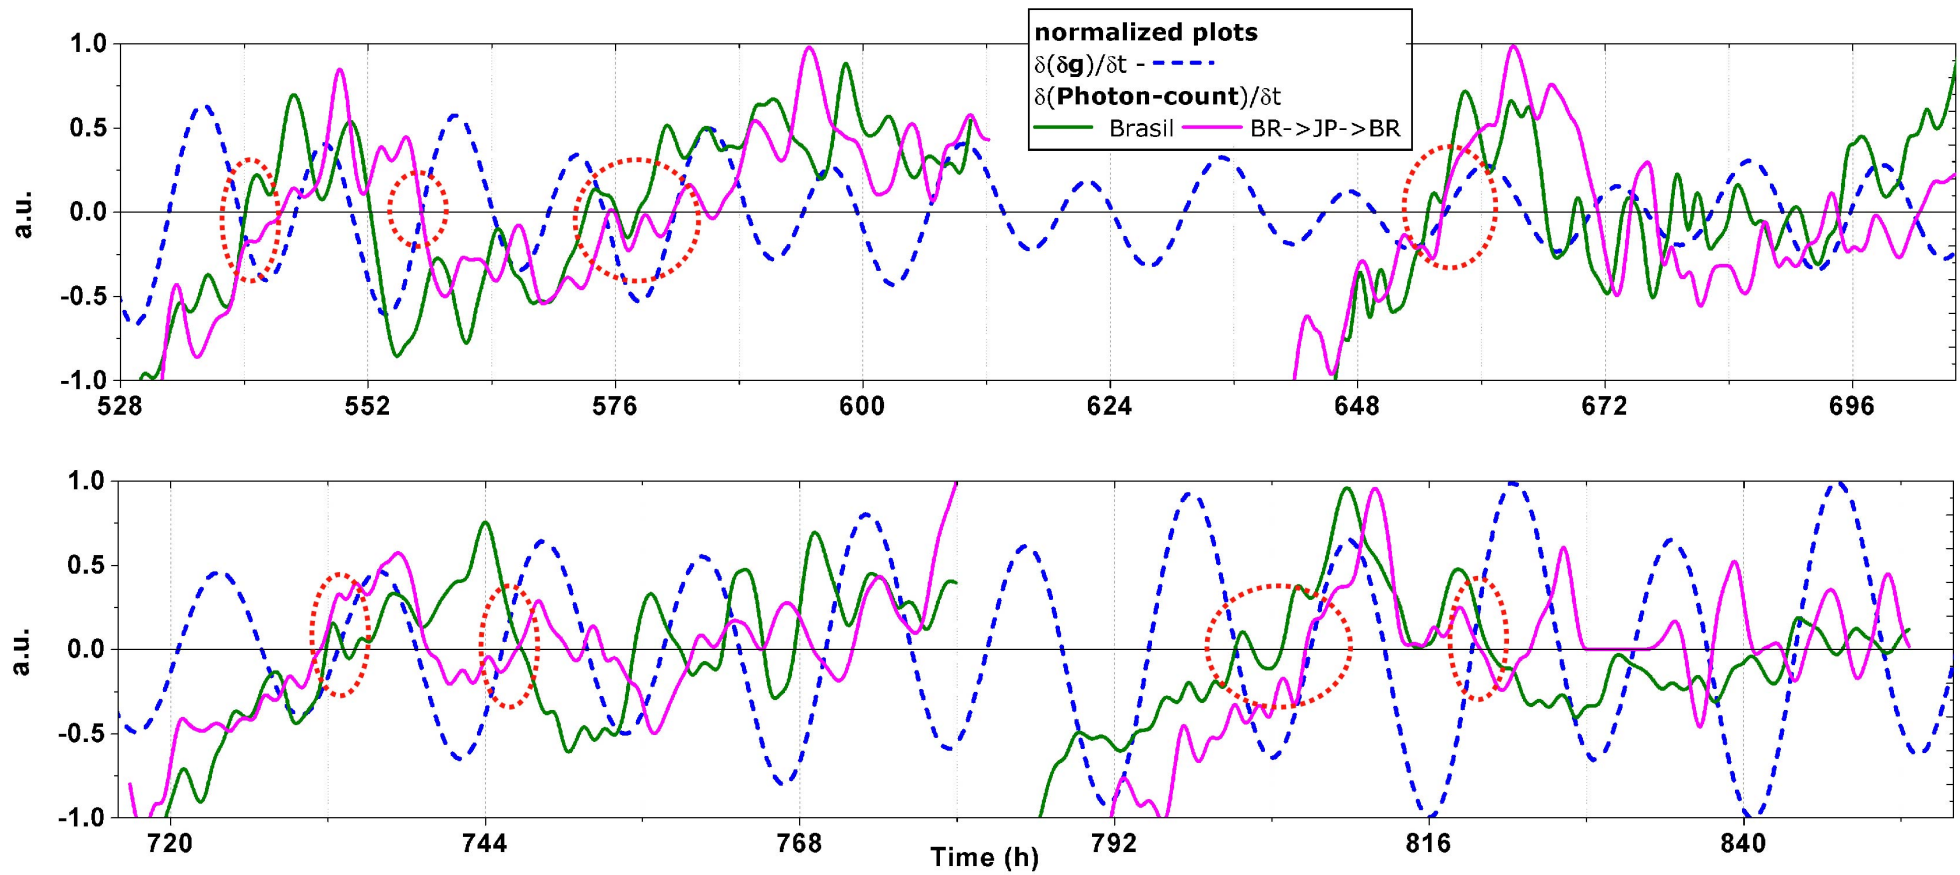

Figure S4. Normalized  $[-1,1]$  plots for the first time derivatives ( $\delta/\delta t$ ) of Fig.2: Photon counts data (100 extrapolated points) of Brazilian samples in Limeira/BR and of samples travelled back from Japan to Brazil, and of the local gravimetric acceleration oscillation ( $\delta(\delta g)/\delta t$ ). Singular coincident crossings are marked with dashed (orange) ellipses.
